# Supplementary material
Source: Elsevier journal article supplement (https://www.sciencedirect.com/science/article/pii/S2255553618301514)
Supplement: mmc1 [file S2255553618301514:mmc1.docx]

**Figuras suplementares**

Figura suplementar 1 - Visão geral esquemática das etapas do procedimento para cada caso incluído no estudo.


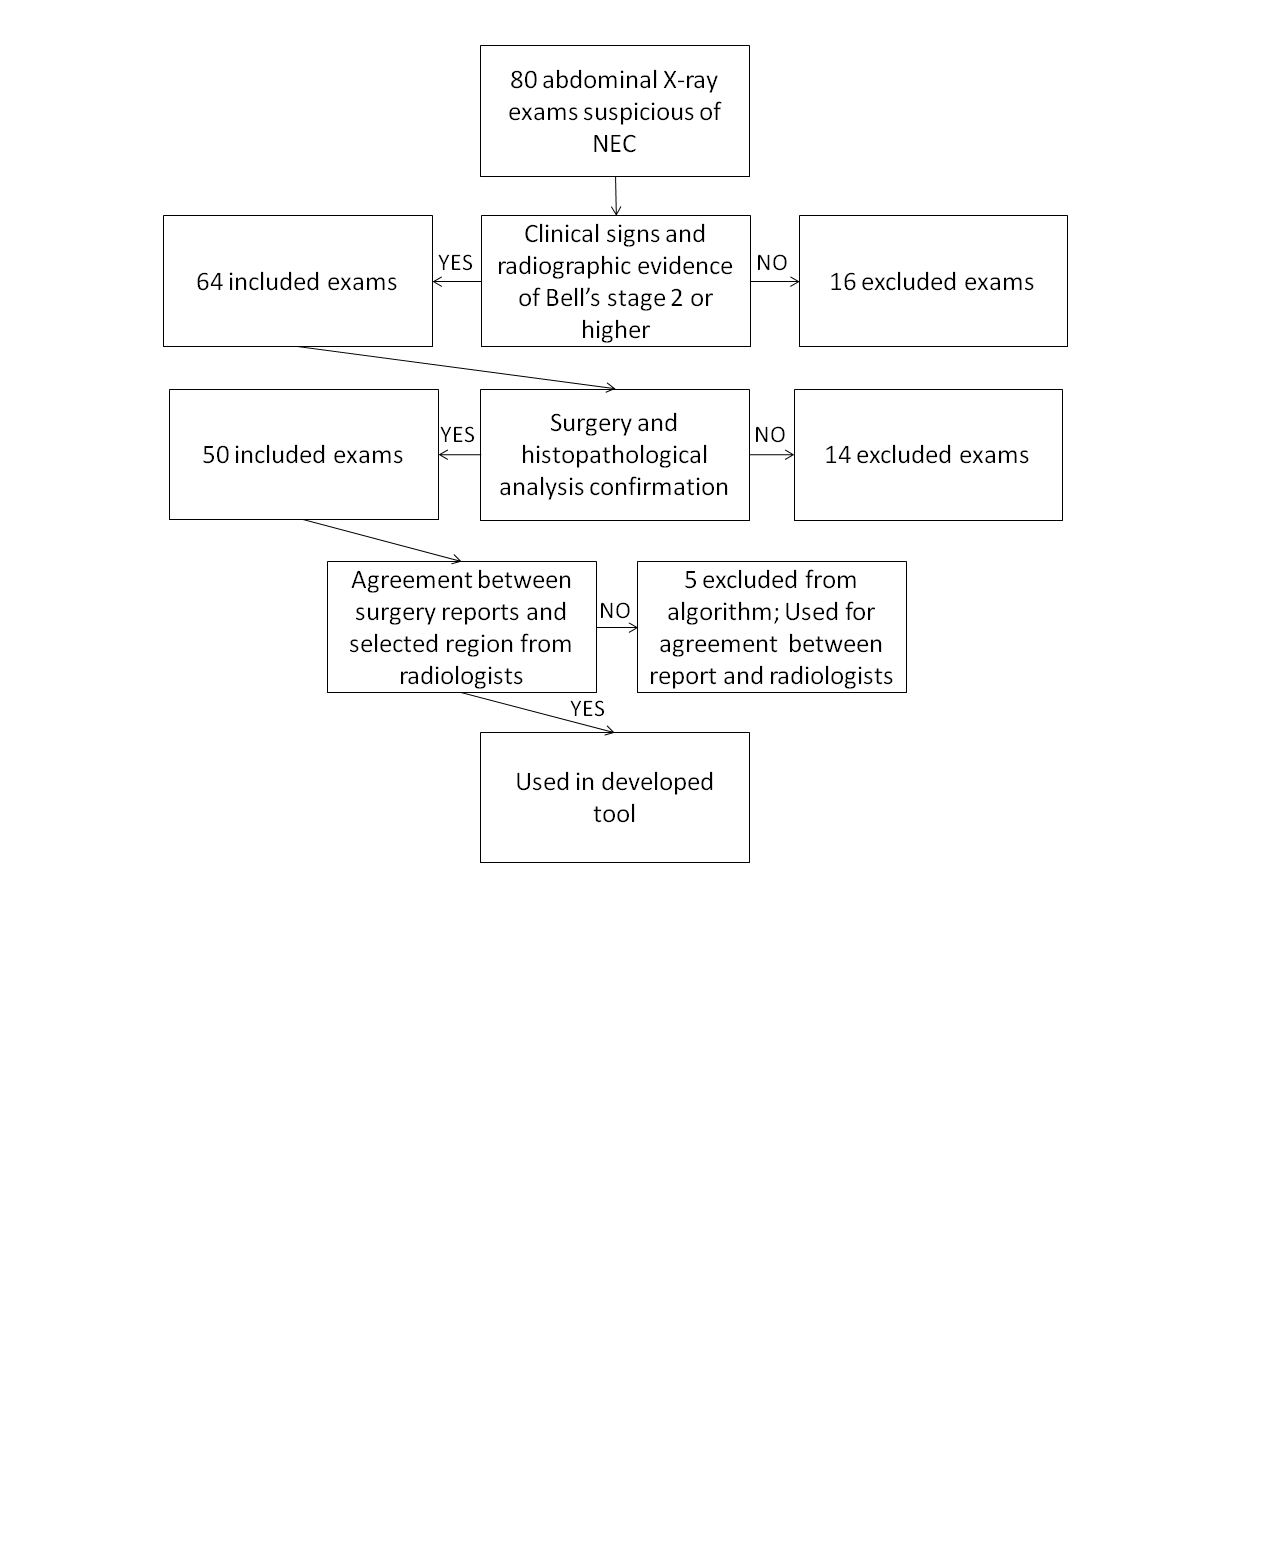


Legenda:

80 abdominal X-ray exams suspicious of NEC = 80 exames de raios-X de abdômen com suspeita de ECN

64 included exams = 64 exames incluídos

Clinical signs and radiographic evidence of Bell’s stage 2 or higher = Sinais clínicos e evidências radiográficas do estágio 2 de Bell ou superior

16 excluded exams = 16 exames excluídos

50 included exams = 50 exames incluídos

Surgery and histopathological analysis confirmation = Cirurgia e confirmação da análise histopatológica

14 excluded exams = 14 exames excluídos

Agreement between surgery report and selected region from radiologists = Concordância entre o laudo cirúrgico e região selecionada pelos radiologistas

5 excluded from algorithm; Used for agreement between report and radiologists = 5 excluídos do algoritmo; Usado para concordância entre o laudo e radiologistas

Used in developed tool = Utilizado na ferramenta desenvolvida

No = Não

Yes = Sim

**Figura suplementar 2 – A, perfil da *scanline* unidimensional da linha desenhada na alça do intestino (pontos) ajustado por uma função Gaussiana (linha); B, medição de largura total à meia altura (FWHM, do inglês *Full Width at Half Maximum*) calculada sobre o ajuste Gaussiano. Essa distância em milímetros é deduzida a partir da dimensão do pixel disponível nas informações do DICOM.**


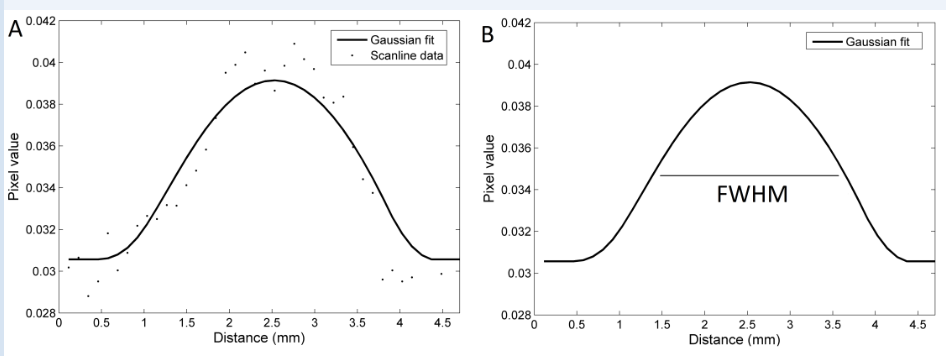


Legenda:

Pixel value = Valor do pixel

Gaussian fit = Ajuste Gaussiano

Scanline data = Dados da scanline

Distance = Distância

Figura suplementar 3 - Análise quantitativa das comparações entre as medidas de largura total à meia altura (FWHM, do inglês *Full Width at Half Maximum*) das alças distendidas e normais no grupo de aumento da espessura da parede intestinal (BWT, *Bowel Wall Thickening*) (medianas = 10,30 e 15,13, respectivamente). Cada caixa mostra os limites inferior e superior da caixa, indicando os percentis 25 e 75. A linha horizontal sólida na caixa indica a mediana. Os *whiskers* acima e abaixo da caixa representam o desvio padrão.


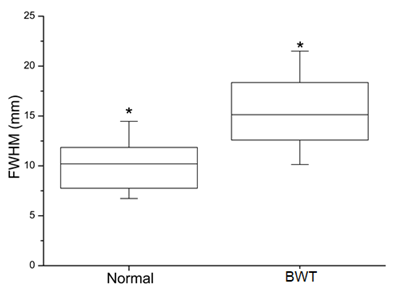


* p < 0,05, diferenças significativas entre os grupos (teste U de Mann-Whitney pareado).

Figura suplementar 4 - Comparações quantitativas de medidas de energia *wavelet* de alças normais e com pneumatose no grupo pneumatose intestinal (PI). Cada caixa mostra os limites inferior e superior da caixa, indicando os percentis 25 e 75. A linha horizontal sólida na caixa indica a mediana. Os *whiskers* acima e abaixo da caixa representam o desvio padrão.


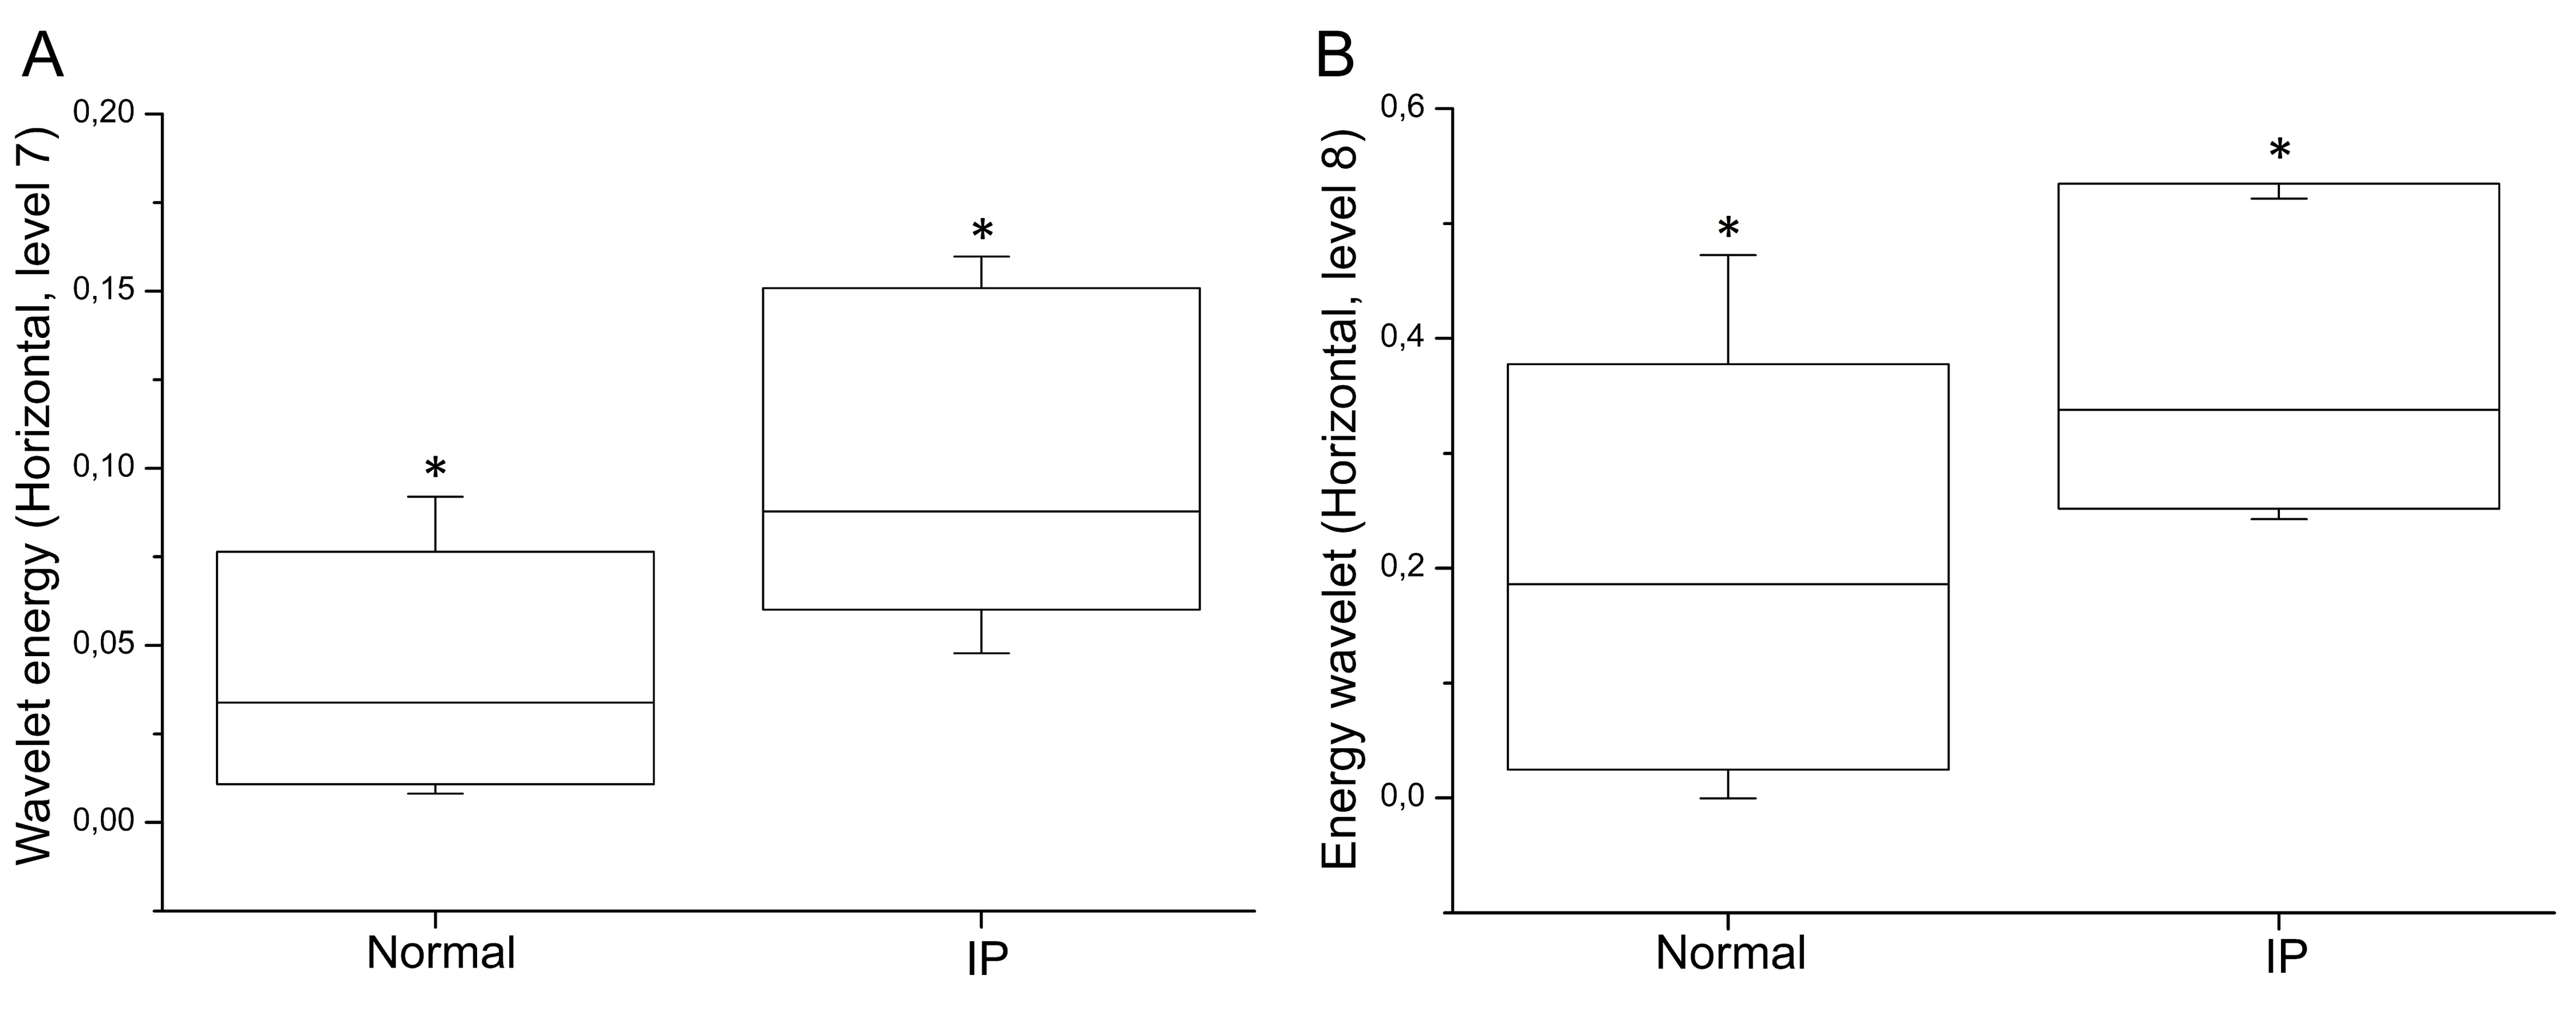


* p < 0,05, diferenças significativas entre os grupos (teste U de Mann-Whitney pareado).

Legenda:

IP = PI

Wavelet energy (Horizontal level 7) = Energia wavelet (Horizontal, nível 7)

Wavelet energy (Horizontal level 8) = Energia wavelet (Horizontal, nível 8)
